# Supplementary material for: Isatin-based three-component synthesis of new spirooxindoles using magnetic nano-sized copper ferrite
Source: Royal Society of Chemistry journal article supplement (doi:10.1039/c5nj03027g), 2016-01-01

# supplementary material

(<sup>13</sup>CNMR and <sup>1</sup>HNMR for new compounds)

Mojtaba Baghernejad, Saeed Khodabakhshi,\* Sanaz Tajik

**Title:**

**Isatin-based three-component synthesis of new spirooxindoles  
using magnetic nano-sized copper ferrite**

*New Journal of Chemistry*

Date: 1/15/2016

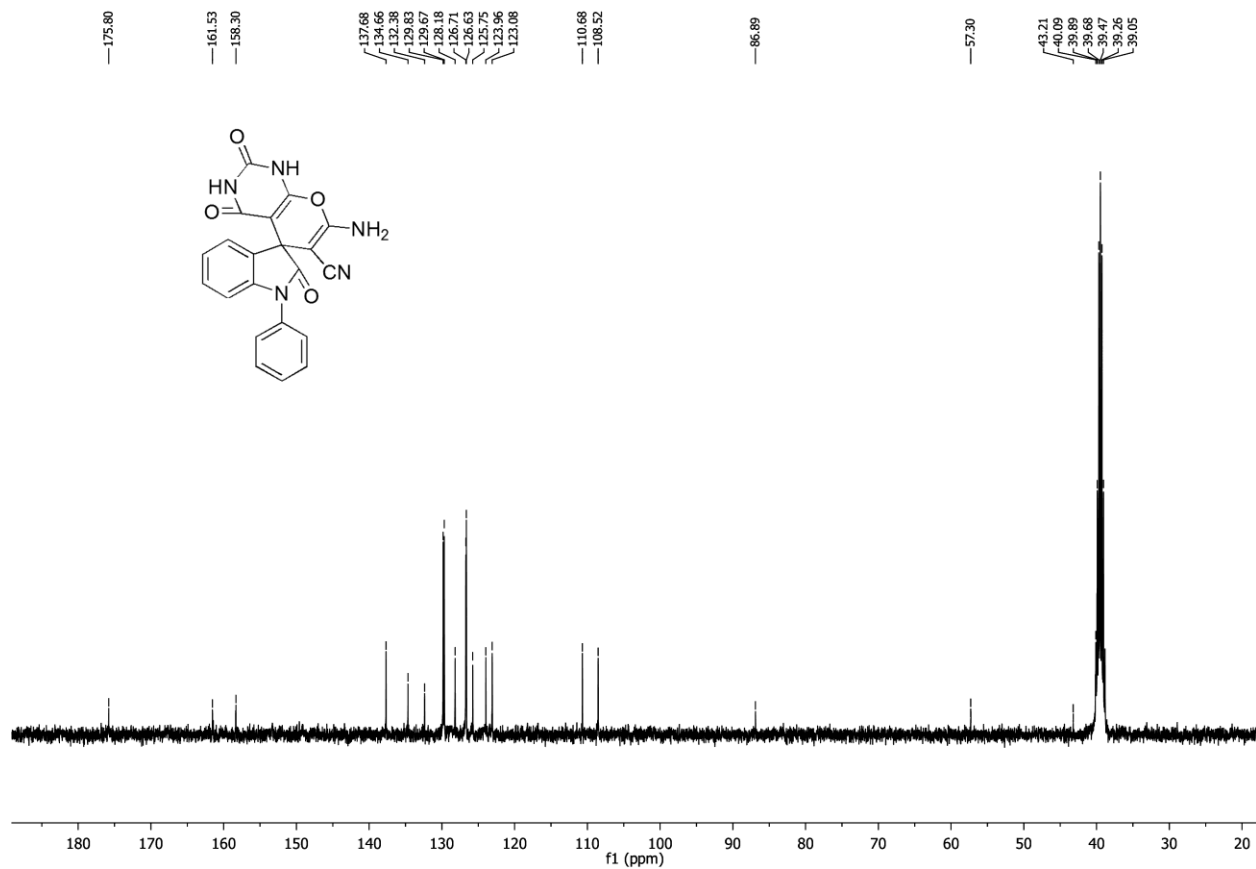

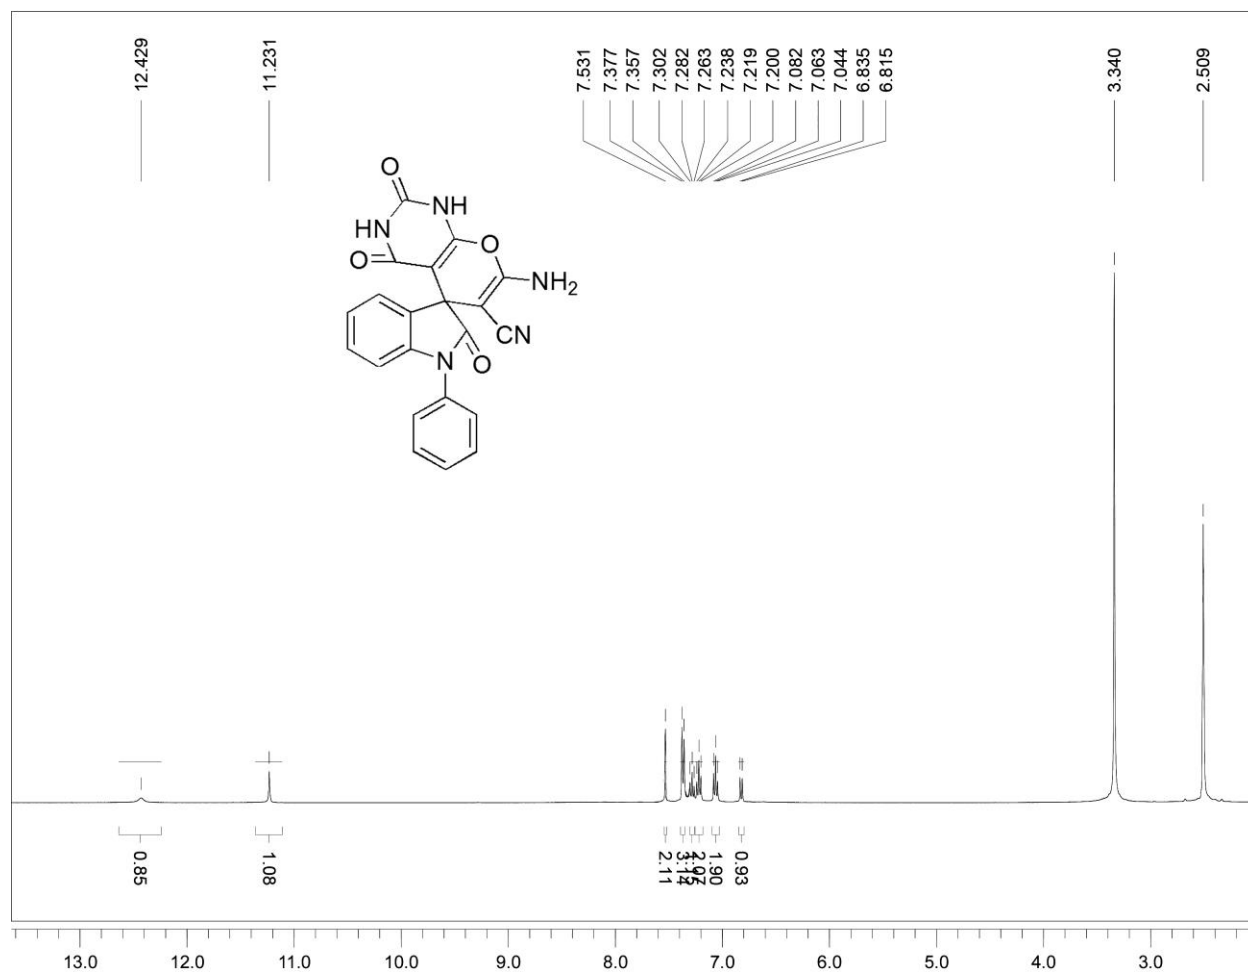

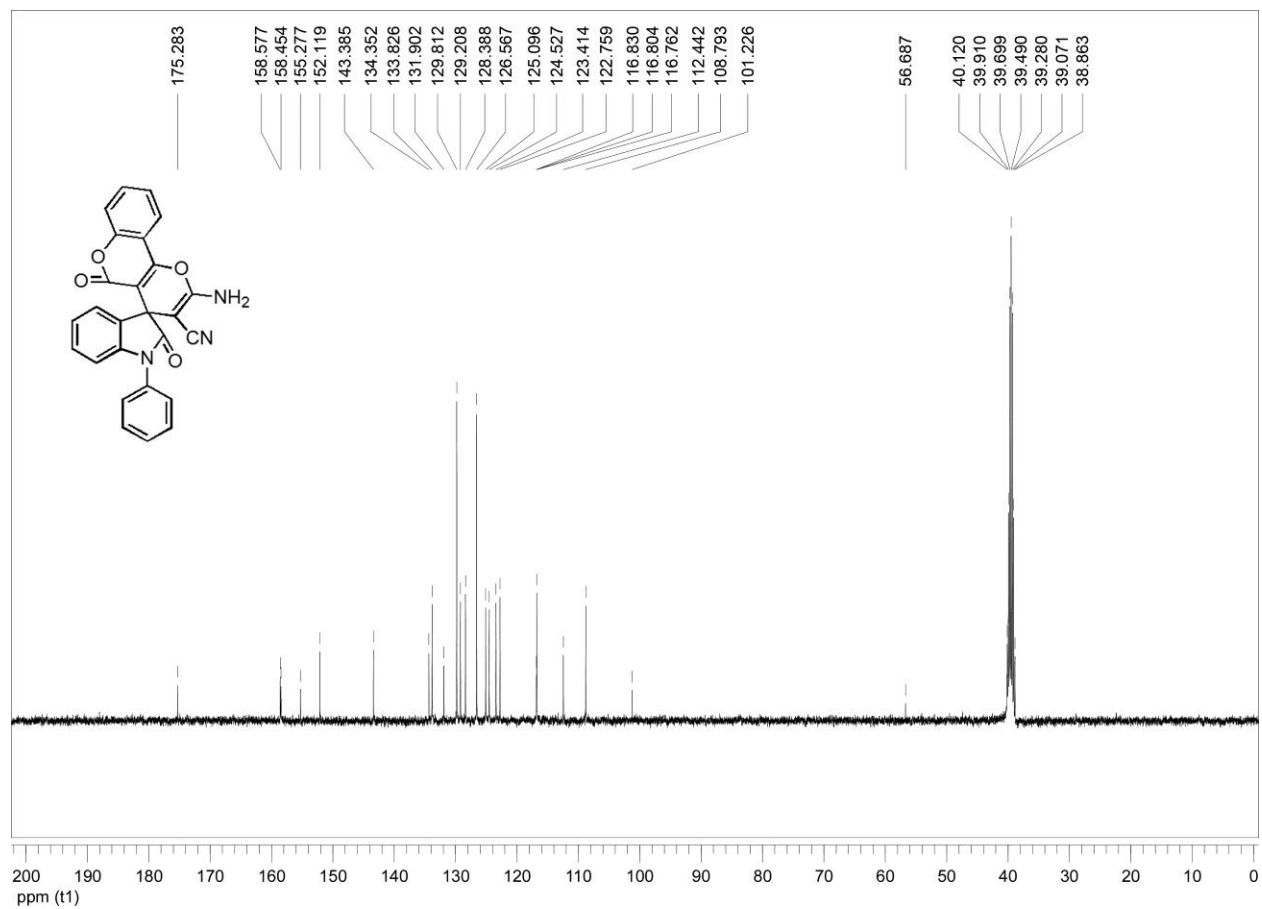

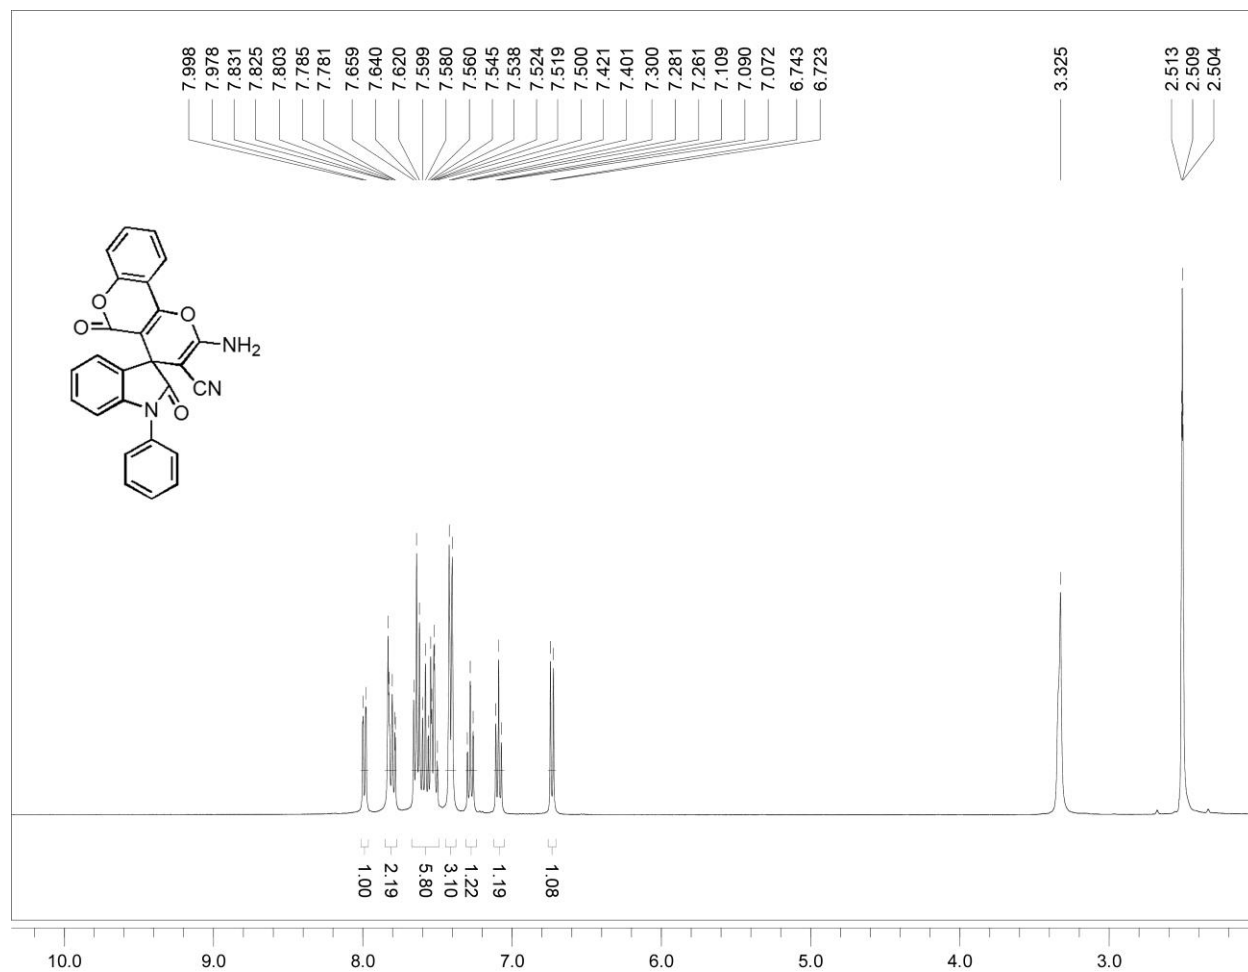

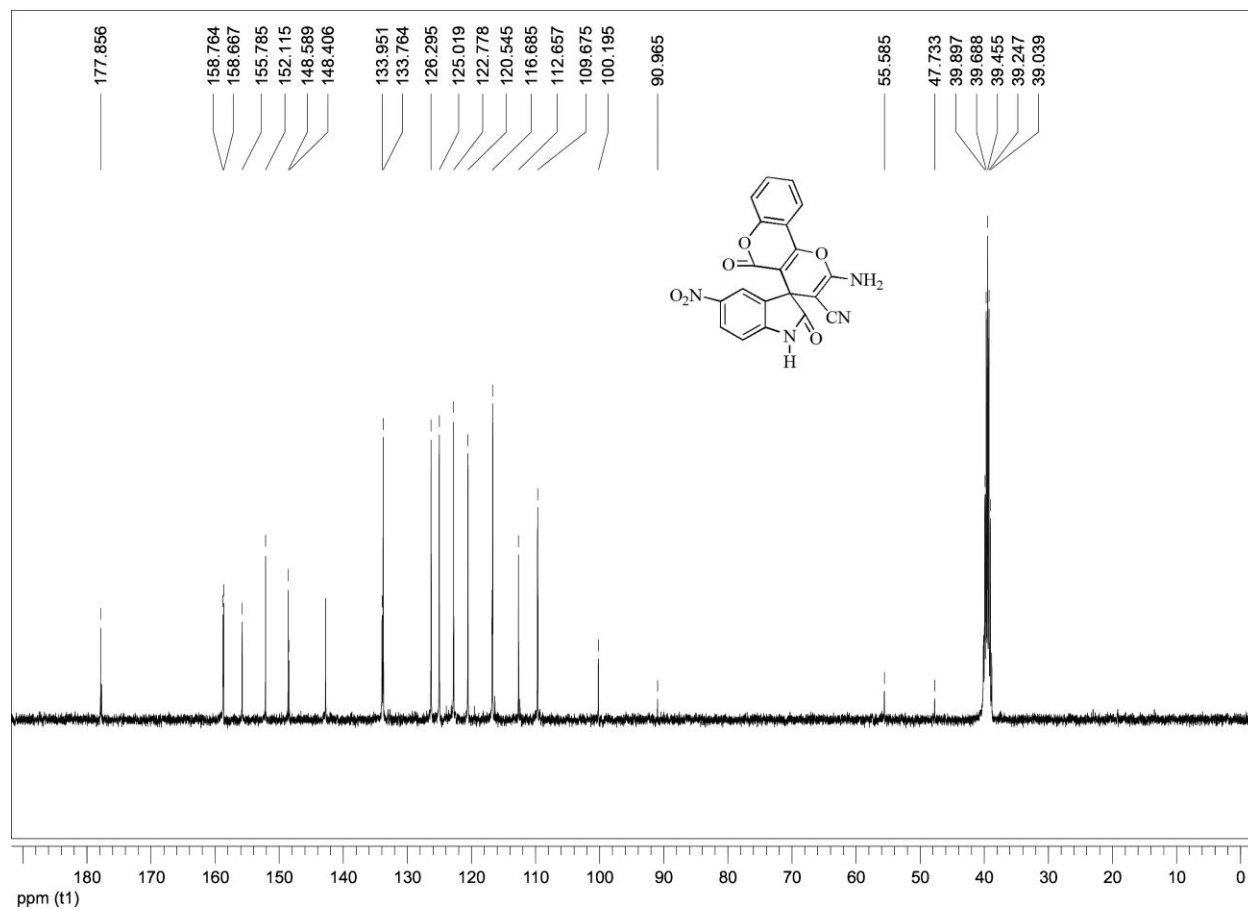

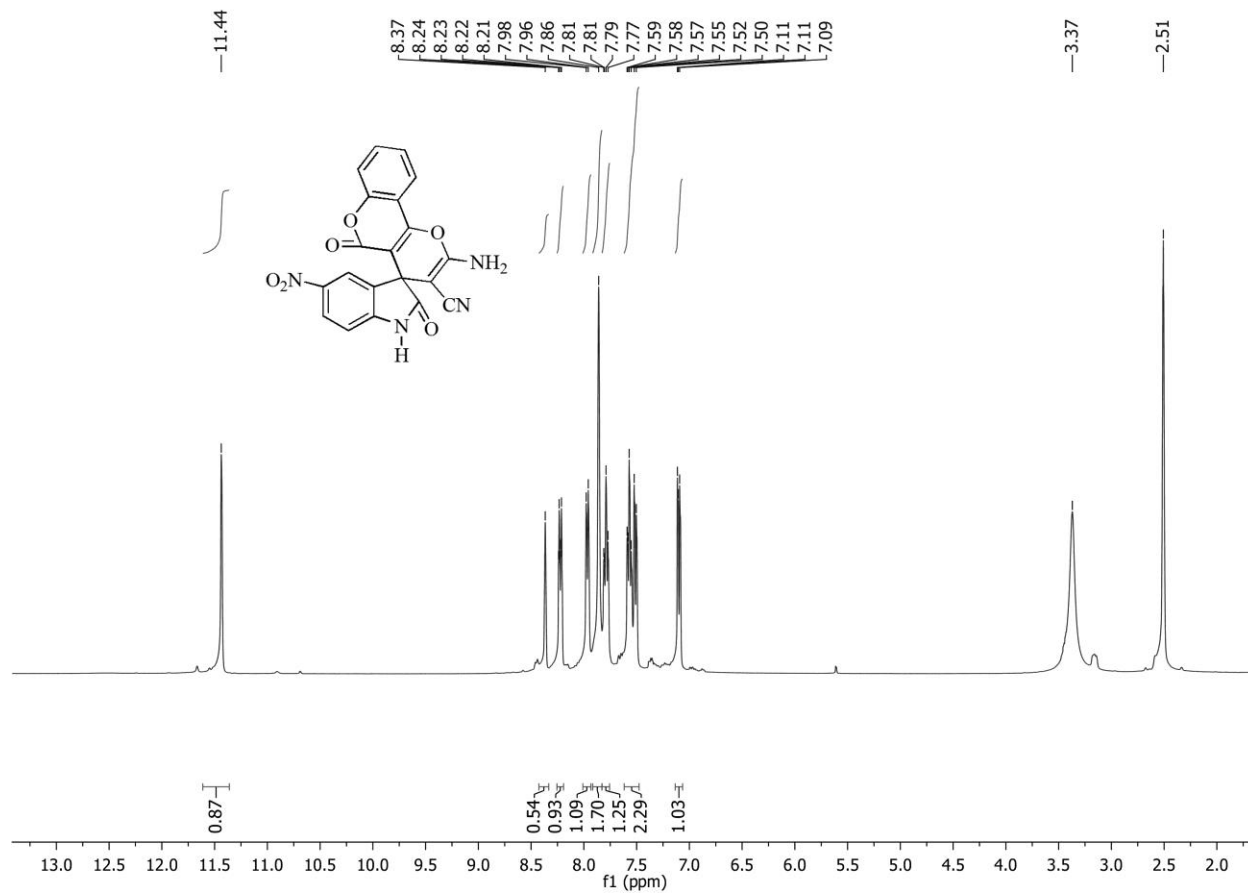

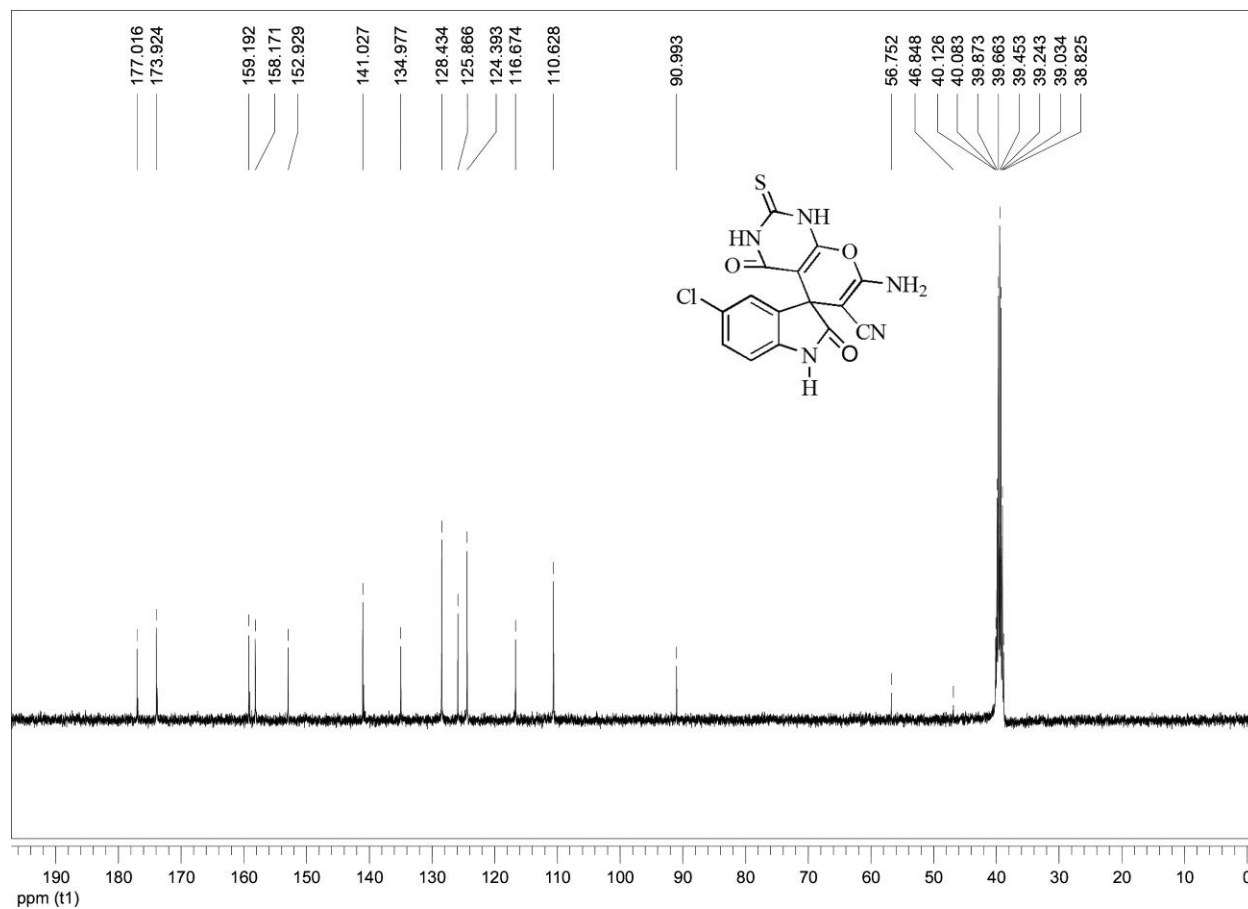



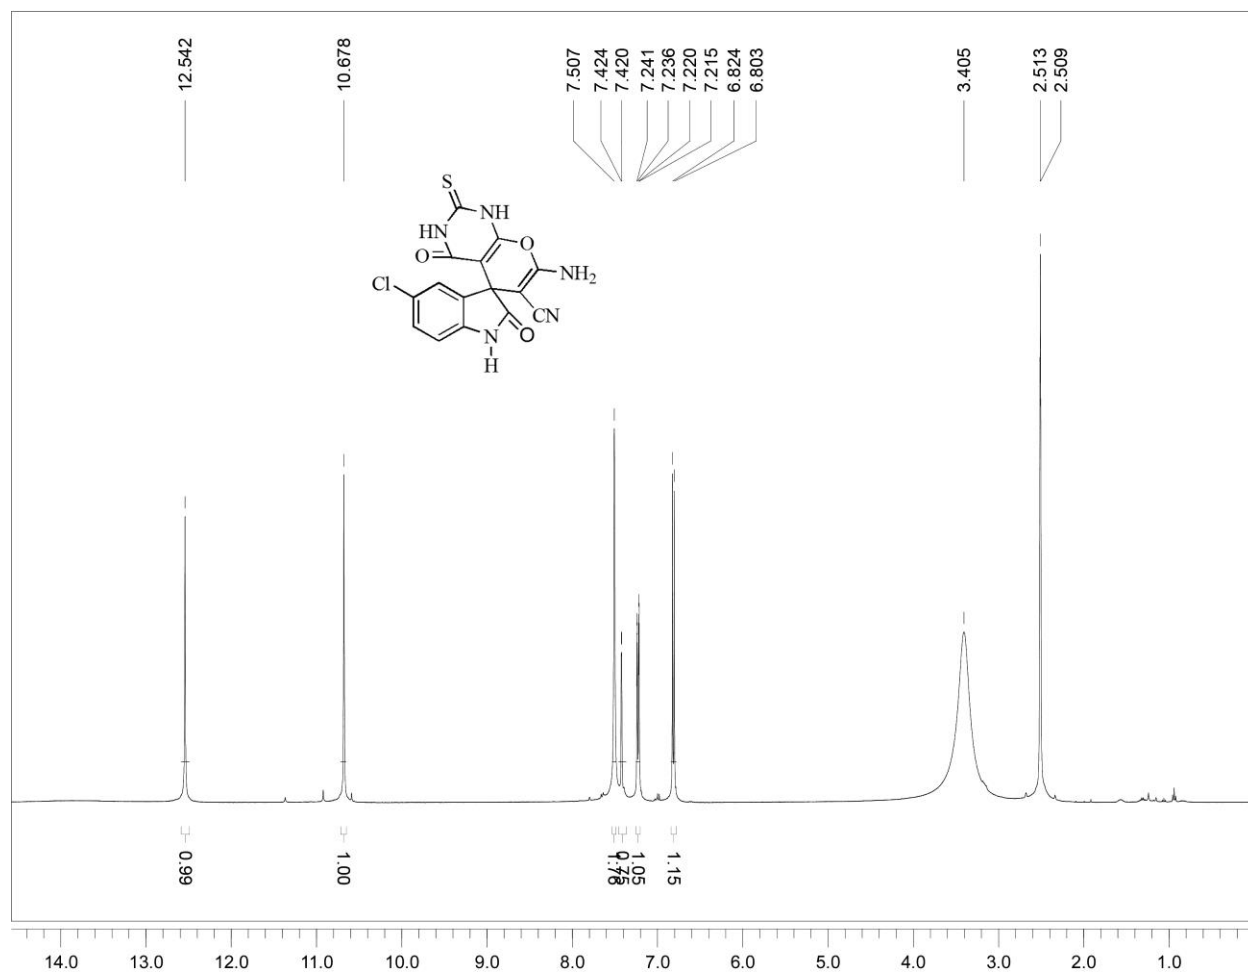

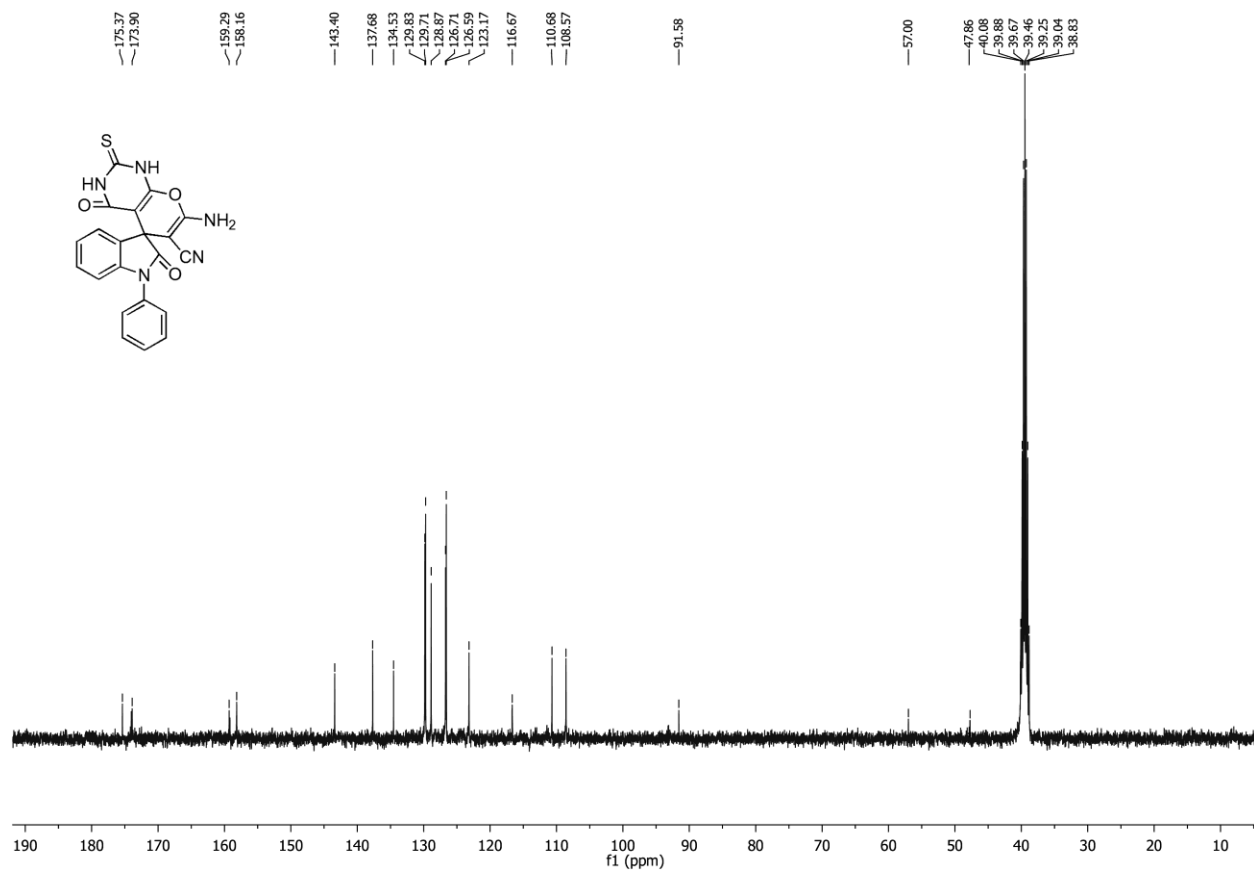

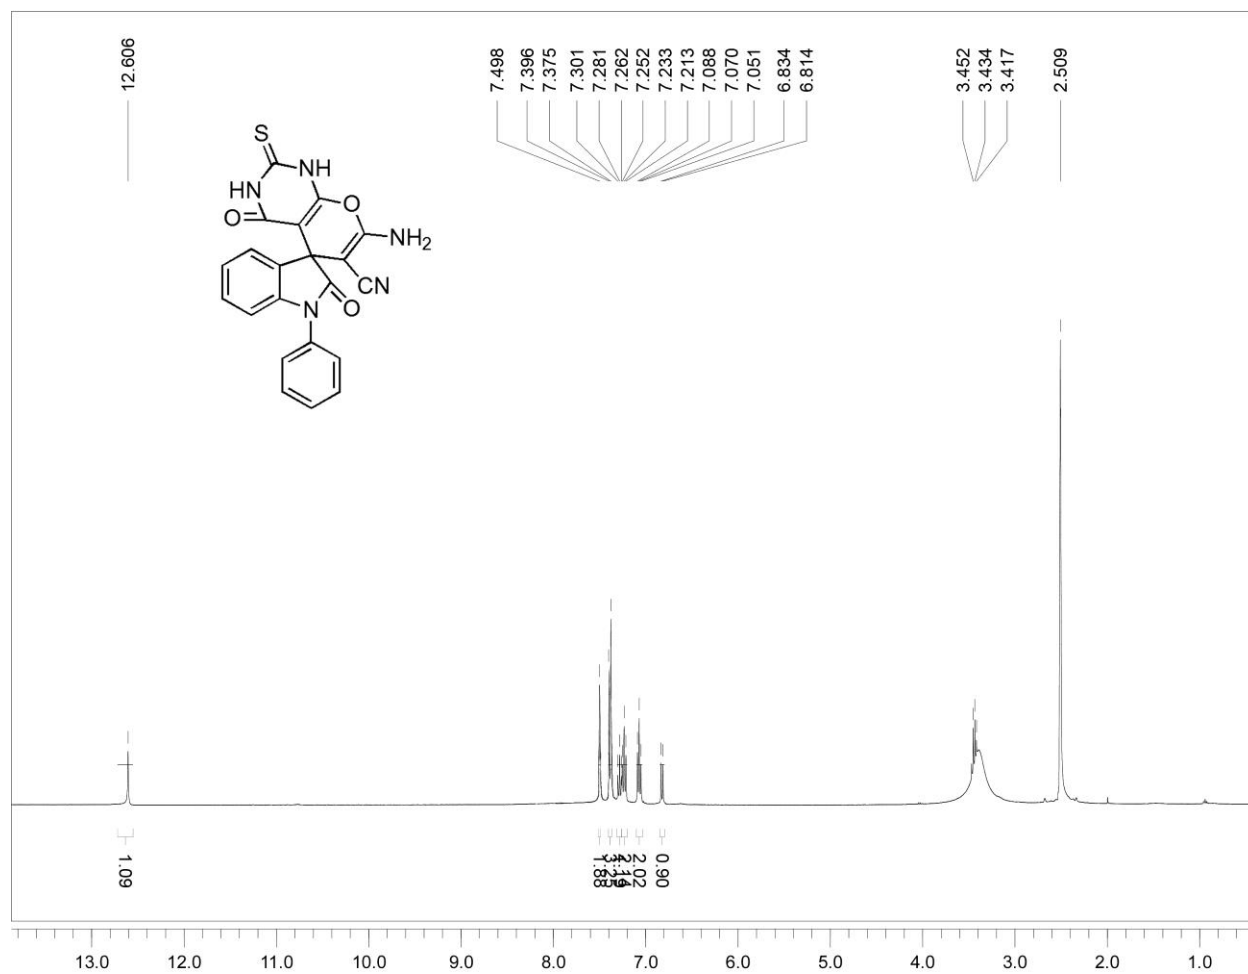

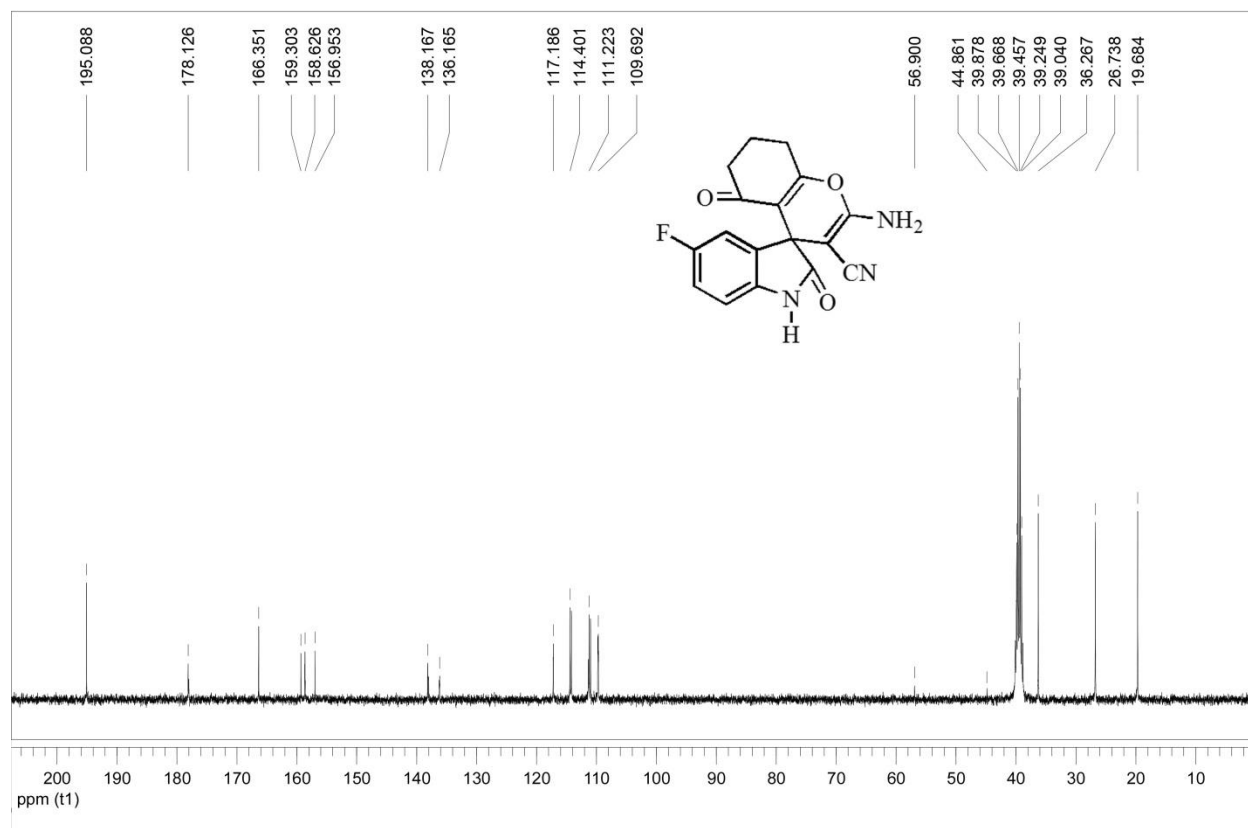

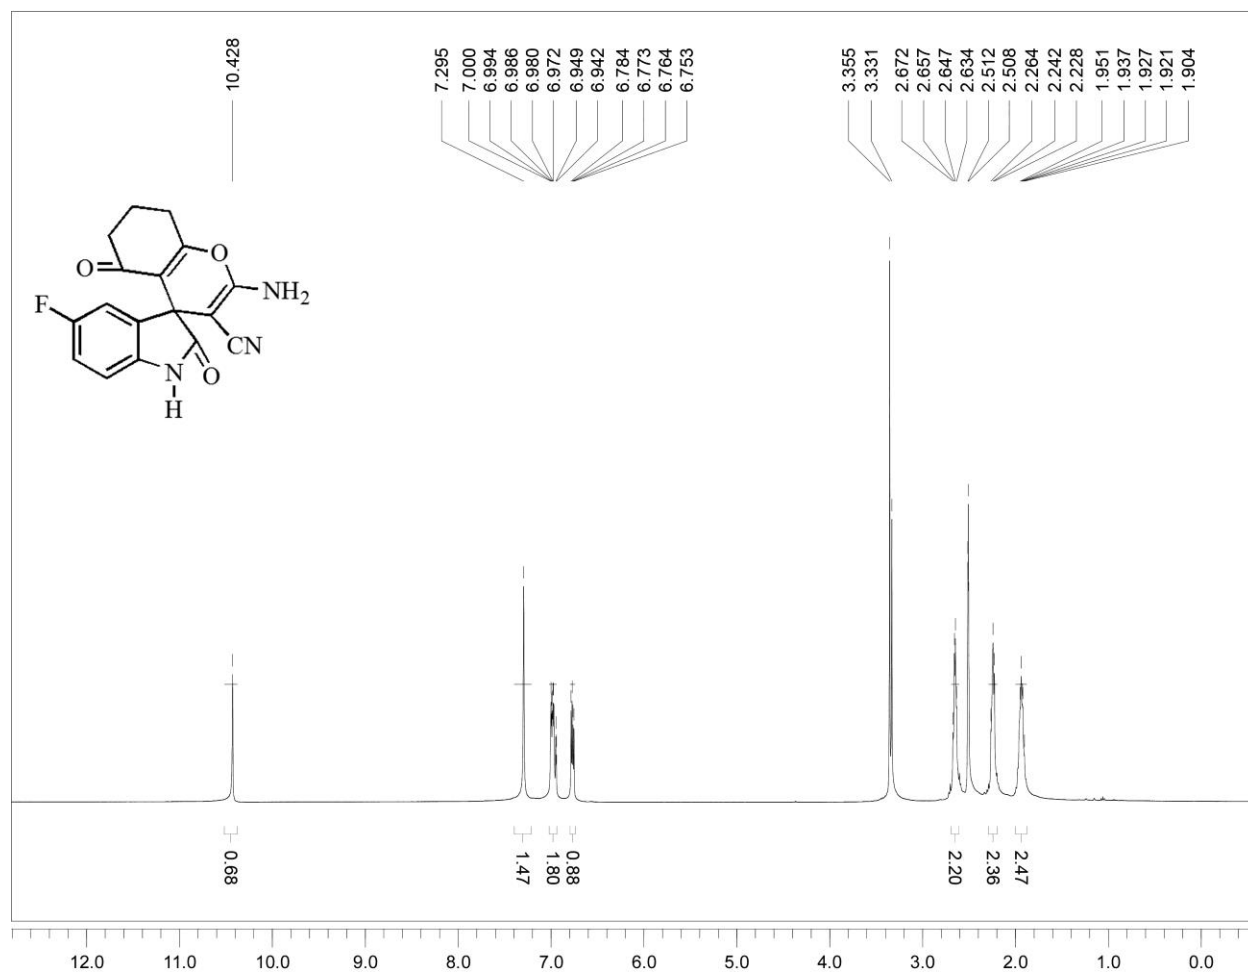

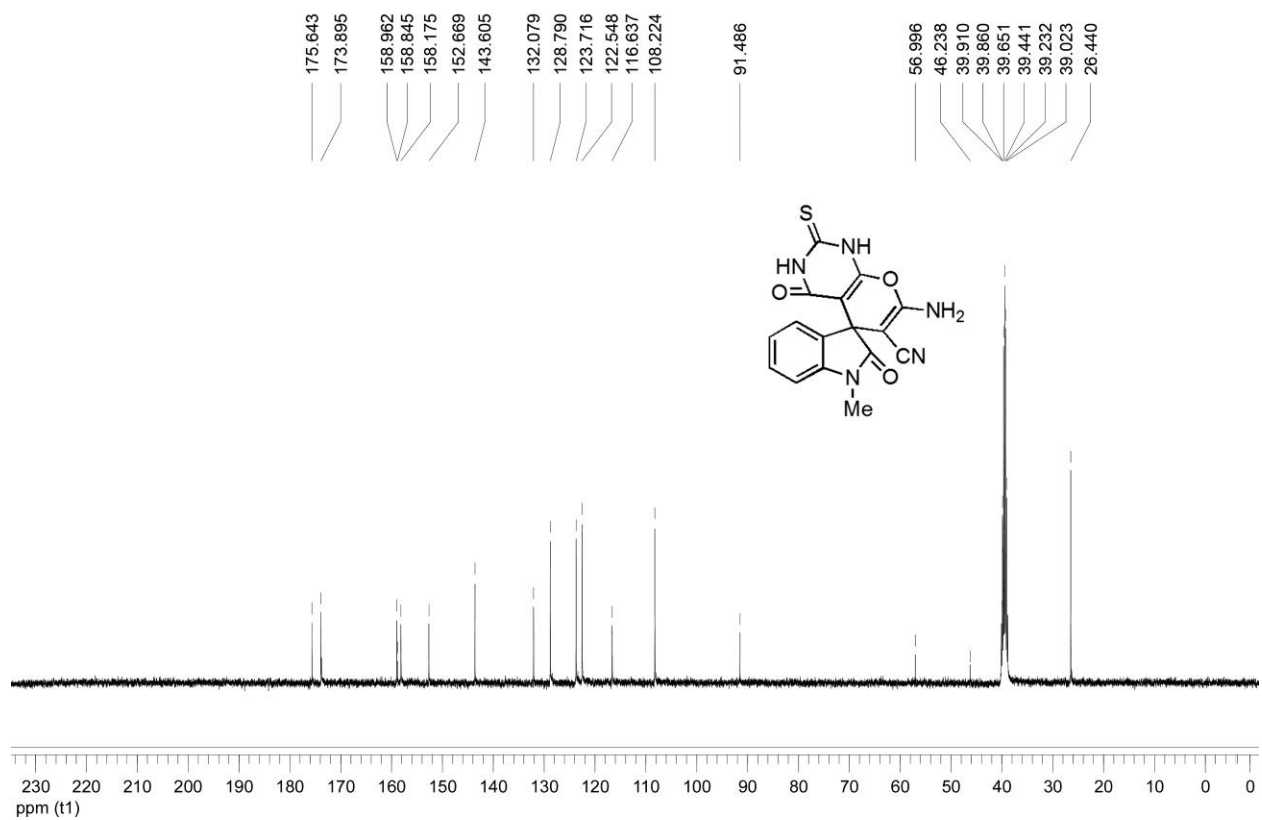

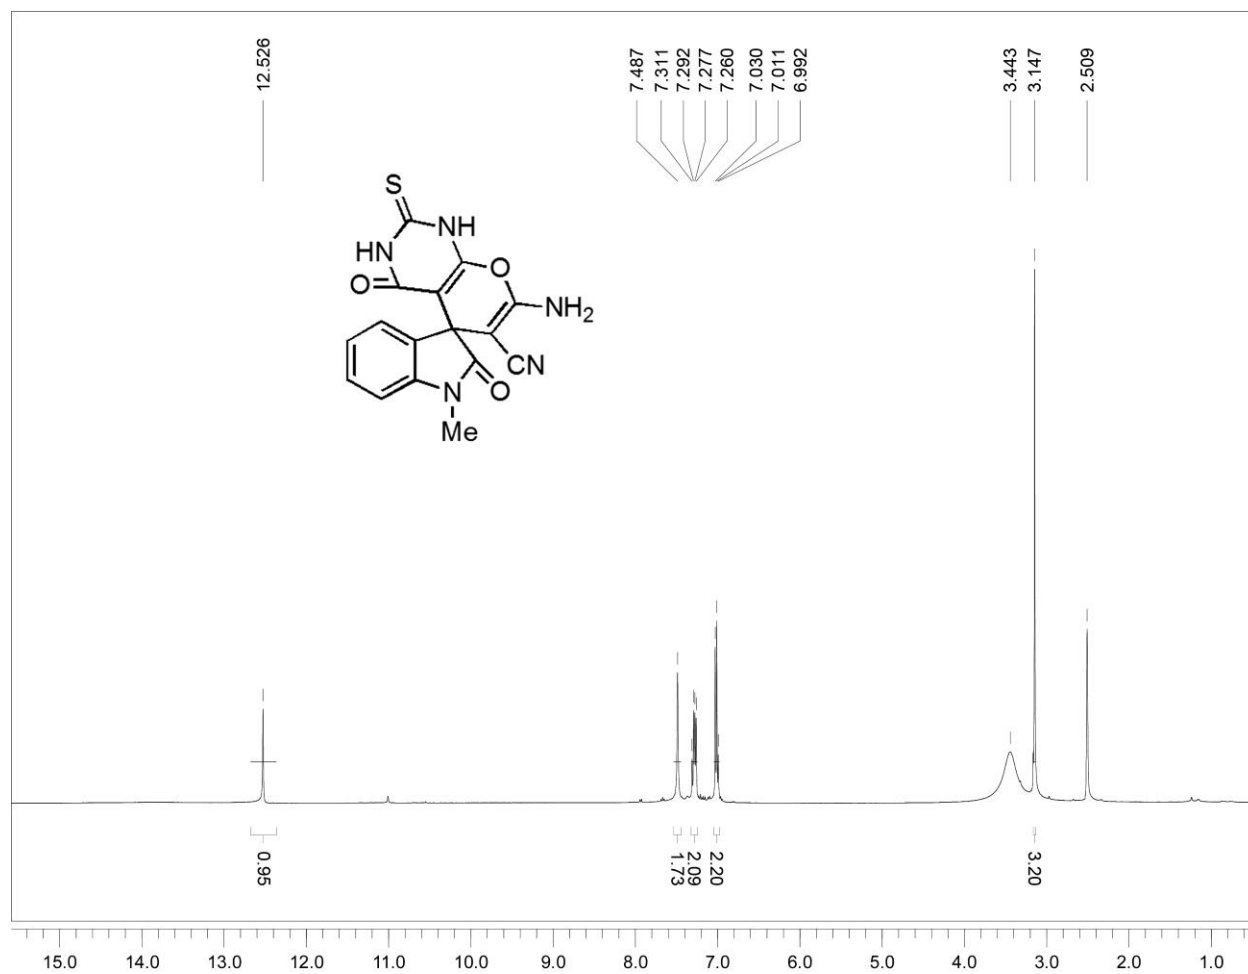

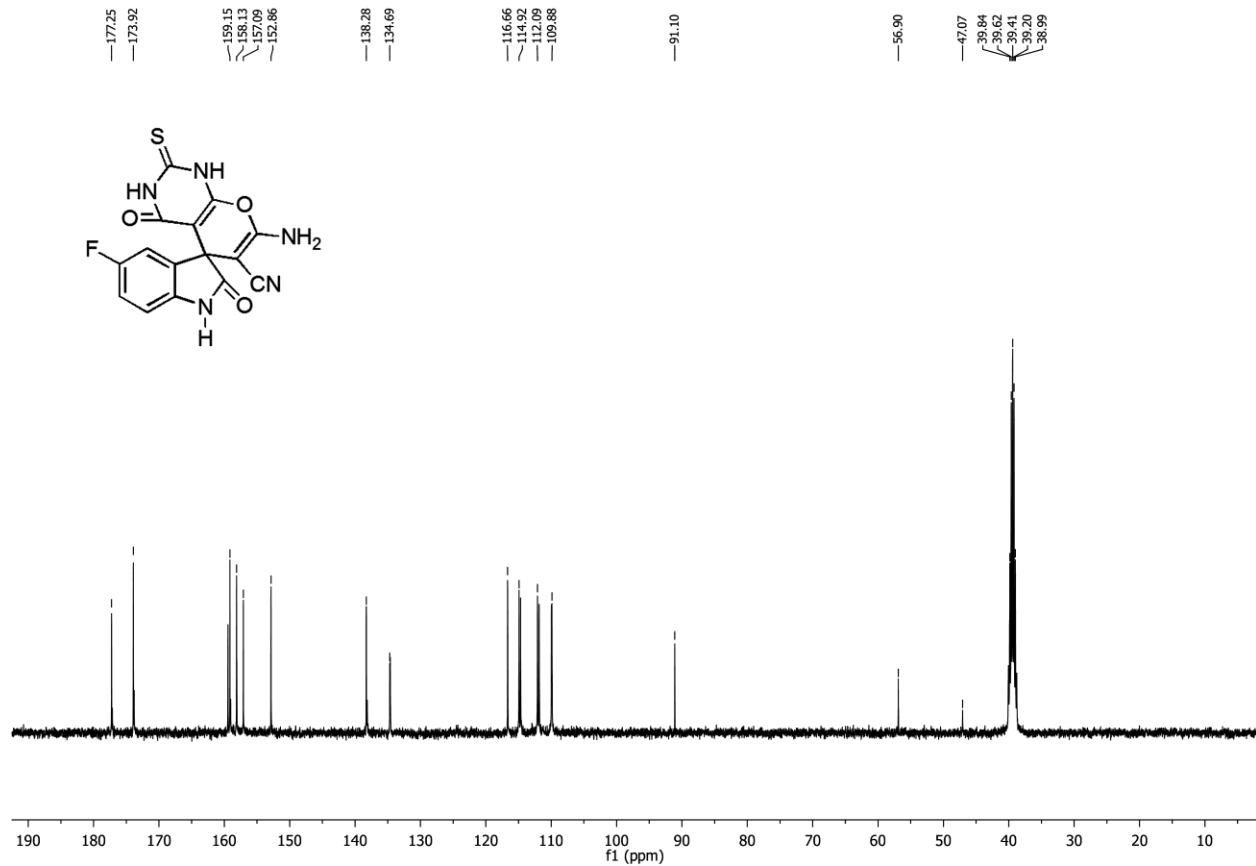



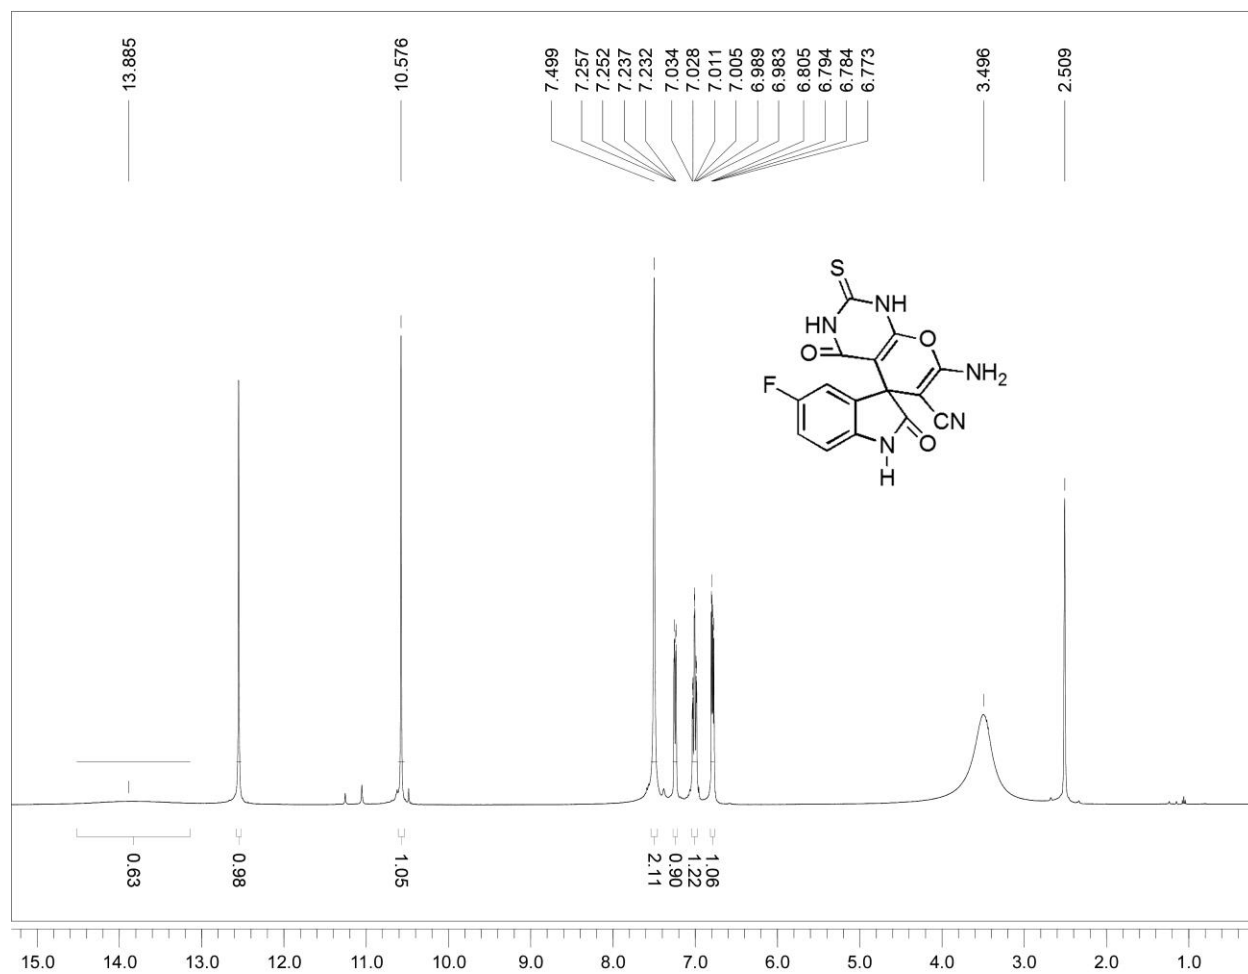

Supplement: c5nj03027g1.pdf [file c5nj03027g1.pdf]
